# Supplementary material for: Global Transcriptomic Analysis and Function Identification of Malolactic Enzyme Pathway of Lactobacillus paracasei L9 in Response to Bile Stress
Source: Front Microbiol. 2018 Aug 23;9:1978. doi: 10.3389/fmicb.2018.01978 (PMC6119781; doi:10.3389/fmicb.2018.01978)
Supplement: Supplementary file 3 [file Table_3.XLSX]

## Sheet: Sheet1
Table S3 The number of reads before and after the trimming step.
Sample name	Raw reads	Clean reads	clean bases
OG1	11096270	10900838	1.64G
OG2	8421970	8268958	1.24G
OG3	10178400	9997302	1.5G
CK1	10204454	9633970	1.45G
CK2	10988994	10346460	1.55G
CK3	9906186	9360264	1.4G
